# Supplementary material for: Association of Postdisaster Depression and Posttraumatic Stress Disorder With Mortality Among Older Disaster Survivors of the 2011 Great East Japan Earthquake and Tsunami
Source: PubMed Central journal article supplement (PMC6991206; doi:10.1001/jamanetworkopen.2019.17550), 2019-12-13
Supplement: jamanetwopen-2-e1917550-s001.pdf [file jamanetwopen-2-e1917550-s001.pdf]

## Supplementary Online Content

Li X, Aida J, Hikichi H, Kondo K, Kawachi I. Association of postdisaster depression and posttraumatic stress disorder with mortality among older disaster survivors of the 2011 Great East Japan Earthquake and Tsunami. *JAMA Netw Open*. 2019;2(12):e1917550. doi:10.1001/jamanetworkopen.2019.17550

**eTable 1.** Comparisons of Predisaster Characteristics: Analytic Sample, Respondents With Missing Postdisaster Depression/PTSD Information, and Nonrespondents in Follow-up

**eTable 2.** Cox Proportional Hazards Models of the Association Between Incident Depression, PTSD, and Mortality, Among the Subsample Free of Depression Before the Disaster

**eTable 3.** Cox Proportional Hazards Models of the Association Between Postdisaster Depression, PTSD, and Mortality, Full Results

**eTable 4.** Cox Proportional Hazards Models of the Association Between Comorbid Postdisaster Depression and PTSD and Mortality, Full Results

**eTable 5.** Cox Proportional Hazards Models of the Association Between Incident Depression, PTSD, and Mortality Using, Among the Subsample Free of Depression Before the Disaster, Full Results

This supplementary material has been provided by the authors to give readers additional information about their work.

**eTable 1. Comparisons of pre-disaster characteristics: analytic sample, respondents with missing postdisaster depression/PTSD information, and nonrespondents in follow-up**

|                                                                                                                                                                               | Analytic sample<br>(N = 2965) | Respondents<br>missing post-<br>disaster<br>depression/PTSD<br>information (N = 602) | Nonrespondents in<br>follow-up (N = 786) |                          |
|-------------------------------------------------------------------------------------------------------------------------------------------------------------------------------|-------------------------------|--------------------------------------------------------------------------------------|------------------------------------------|--------------------------|
|                                                                                                                                                                               | Mean (SD) / No. (%)           | Mean (SD) / No. (%)                                                                  | Mean (SD) / No. (%)                      | P-<br>value <sup>d</sup> |
| Age (mean (sd)), y                                                                                                                                                            | 73.4 (6.2)                    | 75.0 (6.6)                                                                           | 76.0 (7.3)                               | <0.01                    |
| Gender (%)                                                                                                                                                                    |                               |                                                                                      |                                          | <0.01                    |
| Male                                                                                                                                                                          | 1344 (45.3)                   | 208 (34.6)                                                                           | 326 (41.5)                               |                          |
| Female                                                                                                                                                                        | 1621 (54.7)                   | 394 (65.4)                                                                           | 460 (58.5)                               |                          |
| Marital status (%)                                                                                                                                                            |                               |                                                                                      |                                          | <0.01                    |
| Unmarried                                                                                                                                                                     | 786 (27.2)                    | 198 (35.5)                                                                           | 278 (37.2)                               |                          |
| Married                                                                                                                                                                       | 2101 (72.8)                   | 359 (64.5)                                                                           | 469 (62.8)                               |                          |
| Household income (mean (sd)) <sup>a</sup>                                                                                                                                     | 6.8 (3.0)                     | 6.3 (3.4)                                                                            | 6.4 (3.3)                                | <0.01                    |
| Education (%)                                                                                                                                                                 |                               |                                                                                      |                                          | <0.01                    |
| Less than 6 years                                                                                                                                                             | 41 (1.4)                      | 6 (1.1)                                                                              | 35 (4.7)                                 |                          |
| 6-9 years                                                                                                                                                                     | 940 (32.7)                    | 243 (43.8)                                                                           | 277 (37.2)                               |                          |
| 10-12 years                                                                                                                                                                   | 1271 (44.2)                   | 215 (38.7)                                                                           | 286 (38.4)                               |                          |
| 13 years or more                                                                                                                                                              | 622 (21.6)                    | 91 (16.4)                                                                            | 146 (19.6)                               |                          |
| Smoking status (%)                                                                                                                                                            |                               |                                                                                      |                                          | 0.03                     |
| Current                                                                                                                                                                       | 316 (11.5)                    | 50 (9.5)                                                                             | 86 (12.1)                                |                          |
| Used to                                                                                                                                                                       | 780 (28.5)                    | 122 (23.1)                                                                           | 192 (27.1)                               |                          |
| Never                                                                                                                                                                         | 1645 (60.0)                   | 357 (67.5)                                                                           | 430 (60.7)                               |                          |
| Drinking status (%)                                                                                                                                                           |                               |                                                                                      |                                          | <0.01                    |
| Current                                                                                                                                                                       | 1099 (37.8)                   | 178 (30.7)                                                                           | 246 (31.9)                               |                          |
| Used to                                                                                                                                                                       | 103 (3.5)                     | 18 (3.1)                                                                             | 35 (4.5)                                 |                          |
| Never                                                                                                                                                                         | 1705 (58.7)                   | 383 (66.1)                                                                           | 489 (63.5)                               |                          |
| BMI (mean (sd)), kg/m <sup>2</sup>                                                                                                                                            | 23.5 (3.1)                    | 23.5 (3.5)                                                                           | 23.4 (3.4)                               | 0.71                     |
| Social cohesion (mean (sd)) <sup>b</sup>                                                                                                                                      | 3.8 (0.7)                     | 3.8 (0.7)                                                                            | 3.6 (0.8)                                | <0.01                    |
| Pre-disaster depression (%) <sup>c</sup>                                                                                                                                      |                               |                                                                                      |                                          | <0.01                    |
| No                                                                                                                                                                            | 1818 (69.0)                   | 272 (61.8)                                                                           | 382 (59.7)                               |                          |
| Yes                                                                                                                                                                           | 816 (31.0)                    | 168 (38.2)                                                                           | 258 (40.3)                               |                          |
| Definition of abbreviations: BMI = body mass index; PTSD = posttraumatic stress disorder.                                                                                     |                               |                                                                                      |                                          |                          |
| <sup>a</sup> Household income was rated on a 15-item scale (1 = less than 0.5 million JPY, 15 = 12 million JPY or more).                                                      |                               |                                                                                      |                                          |                          |
| <sup>b</sup> Social cohesion score ranged from 1 (low) to 5 (high).                                                                                                           |                               |                                                                                      |                                          |                          |
| <sup>c</sup> Depression was measured using the Geriatric Depression Scale.                                                                                                    |                               |                                                                                      |                                          |                          |
| <sup>d</sup> P-value for comparisons of covariates between groups using Chi-square test and one-way ANOVA test to compare categorical and continuous variables, respectively. |                               |                                                                                      |                                          |                          |

**eTable 2. Cox proportional hazards models of the association between incident depression, PTSD, and mortality, among the subsample free of depression before the disaster**

| Risk factor                | Model 1 <sup>a</sup> |                     | Model 2 <sup>b</sup> |                     | Model 3 <sup>c</sup> |                     |
|----------------------------|----------------------|---------------------|----------------------|---------------------|----------------------|---------------------|
|                            | HR                   | [95% CI]            | HR                   | [95% CI]            | HR                   | [95% CI]            |
| <b>Incident depression</b> | <b>2.86 ***</b>      | <b>[1.87, 4.35]</b> | <b>2.09 **</b>       | <b>[1.25, 3.49]</b> | <b>2.16 **</b>       | <b>[1.29, 3.61]</b> |
| <b>PTSD</b>                | 0.76                 | [0.47, 1.24]        | 0.88                 | [0.49, 1.59]        | 1.01                 | [0.55, 1.88]        |

Definition of abbreviations: PTSD = posttraumatic stress disorder; HR = hazard ratio; CI = confidence interval.

\*\*\* p < 0.001; \*\* p < 0.01; \* p < 0.05.

<sup>a</sup> Model 1 included only post-disaster depression and PTSD.

<sup>b</sup> Model 2 further controlled for pre-disaster socio-demographics, lifestyle covariates, and social cohesion.

<sup>c</sup> Model 3 further controlled for disaster experiences.

**eTable 3. Cox proportional hazards models of the association between postdisaster depression, PTSD, and mortality, full results**

| Risk factor                              | Model 1 <sup>a</sup> |                     | Model 2 <sup>b</sup> |                     | Model 3 <sup>c</sup> |                     |
|------------------------------------------|----------------------|---------------------|----------------------|---------------------|----------------------|---------------------|
|                                          | HR                   | [95% CI]            | HR                   | [95% CI]            | HR                   | [95% CI]            |
| <b>Depression</b>                        | <b>2.36</b><br>***   | <b>[1.80, 3.09]</b> | <b>2.22</b><br>***   | <b>[1.49, 3.30]</b> | <b>2.29</b><br>***   | <b>[1.54, 3.42]</b> |
| <b>PTSD</b>                              | 0.91                 | [0.67, 1.23]        | 0.99                 | [0.67, 1.45]        | 1.10                 | [0.73, 1.64]        |
| Age, years                               |                      |                     | <b>1.09</b><br>***   | <b>[1.07, 1.12]</b> | <b>1.09</b><br>***   | <b>[1.06, 1.12]</b> |
| Female (vs. male)                        |                      |                     | 0.75                 | [0.44, 1.29]        | 0.73                 | [0.43, 1.25]        |
| Married (vs. no)                         |                      |                     | 0.91                 | [0.61, 1.37]        | 0.94                 | [0.63, 1.41]        |
| Household income                         |                      |                     | 1.03                 | [0.98, 1.09]        | 1.03                 | [0.97, 1.09]        |
| Education (vs. 10-12 years)              |                      |                     |                      |                     |                      |                     |
| <6 years                                 |                      |                     | 1.11                 | [0.38, 3.21]        | 1.21                 | [0.42, 3.53]        |
| 6-9 years                                |                      |                     | <b>1.56 *</b>        | <b>[1.07, 2.29]</b> | <b>1.68 **</b>       | <b>[1.14, 2.47]</b> |
| >12 years                                |                      |                     | 0.92                 | [0.57, 1.50]        | 0.94                 | [0.58, 1.52]        |
| Smoking status (vs. never)               |                      |                     |                      |                     |                      |                     |
| Current                                  |                      |                     | 1.36                 | [0.72, 2.58]        | 1.32                 | [0.70, 2.51]        |
| Used to                                  |                      |                     | <b>1.71 *</b>        | <b>[1.06, 2.77]</b> | <b>1.67 *</b>        | <b>[1.03, 2.71]</b> |
| Drinking status (vs. never)              |                      |                     |                      |                     |                      |                     |
| Current                                  |                      |                     | 0.70                 | [0.46, 1.07]        | 0.71                 | [0.47, 1.08]        |
| Used to                                  |                      |                     | 1.52                 | [0.80, 2.89]        | 1.56                 | [0.81, 2.99]        |
| BMI, kg/m <sup>2</sup>                   |                      |                     | 0.97                 | [0.91, 1.02]        | 0.97                 | [0.92, 1.03]        |
| Social cohesion                          |                      |                     | 0.97                 | [0.75, 1.24]        | 0.98                 | [0.76, 1.27]        |
| Pre-disaster depression                  |                      |                     | 0.99                 | [0.67, 1.48]        | 0.97                 | [0.65, 1.45]        |
| Financial hardship (vs. no)              |                      |                     |                      |                     | 0.69                 | [0.43, 1.12]        |
| Property damage (vs. no)                 |                      |                     |                      |                     |                      |                     |
| Half destroyed or worse                  |                      |                     |                      |                     | 1.12                 | [0.64, 1.96]        |
| Partially destroyed                      |                      |                     |                      |                     | 0.98                 | [0.68, 1.40]        |
| Health care disruption (vs. no)          |                      |                     |                      |                     | 1.34                 | [0.82, 2.17]        |
| Loss of close relatives/friends (vs. no) |                      |                     |                      |                     | 0.74                 | [0.51, 1.07]        |

Definition of abbreviations: PTSD = posttraumatic stress disorder; HR = hazard ratio; CI = confidence interval.

\*\*\* p < 0.001; \*\* p < 0.01; \* p < 0.05.

<sup>a</sup> Model 1 included only post-disaster depression and PTSD.

<sup>b</sup> Model 2 further controlled for pre-disaster socio-demographics, lifestyle covariates, social cohesion, and pre-disaster depression.

<sup>c</sup> Model 3 further controlled for disaster experiences.

**eTable 4. Cox proportional hazards models of the association between comorbid postdisaster depression and PTSD and mortality, full results**

| Risk factor                              | Model 1 <sup>a</sup> |                     | Model 2 <sup>b</sup> |                     | Model 3 <sup>c</sup> |                     |
|------------------------------------------|----------------------|---------------------|----------------------|---------------------|----------------------|---------------------|
|                                          | HR                   | [95% CI]            | HR                   | [95% CI]            | HR                   | [95% CI]            |
| <b>Comorbid depression and PTSD</b>      |                      |                     |                      |                     |                      |                     |
| (vs. neither depression nor PTSD)        |                      |                     |                      |                     |                      |                     |
| PTSD only                                | 0.96                 | [0.58, 1.60]        | 0.93                 | [0.47, 1.84]        | 1.02                 | [0.51, 2.04]        |
| Depression only                          | <b>2.41</b><br>***   | <b>[1.77, 3.28]</b> | <b>2.17</b><br>***   | <b>[1.40, 3.38]</b> | <b>2.24</b><br>***   | <b>[1.43, 3.49]</b> |
| PTSD & depression                        | <b>2.13</b><br>***   | <b>[1.49, 3.04]</b> | <b>2.21</b> **       | <b>[1.35, 3.61]</b> | <b>2.54</b><br>***   | <b>[1.50, 4.27]</b> |
| Age, years                               |                      |                     | <b>1.09</b><br>***   | <b>[1.07, 1.12]</b> | <b>1.09</b><br>***   | <b>[1.06, 1.12]</b> |
| Female (vs. male)                        |                      |                     | 0.75                 | [0.44, 1.29]        | 0.73                 | [0.43, 1.25]        |
| Married (vs. no)                         |                      |                     | 0.91                 | [0.61, 1.37]        | 0.94                 | [0.63, 1.41]        |
| Household income                         |                      |                     | 1.03                 | [0.98, 1.09]        | 1.03                 | [0.97, 1.09]        |
| Education (vs. 10-12 years)              |                      |                     |                      |                     |                      |                     |
| <6 years                                 |                      |                     | 1.11                 | [0.38, 3.23]        | 1.22                 | [0.42, 3.56]        |
| 6-9 years                                |                      |                     | <b>1.57</b> *        | <b>[1.07, 2.29]</b> | <b>1.68</b> **       | <b>[1.14, 2.48]</b> |
| >12 years                                |                      |                     | 0.92                 | [0.57, 1.50]        | 0.94                 | [0.58, 1.52]        |
| Smoking status (vs. never)               |                      |                     |                      |                     |                      |                     |
| Current                                  |                      |                     | 1.37                 | [0.72, 2.59]        | 1.33                 | [0.70, 2.52]        |
| Used to                                  |                      |                     | <b>1.72</b> *        | <b>[1.06, 2.78]</b> | <b>1.68</b> *        | <b>[1.03, 2.72]</b> |
| Drinking status (vs. never)              |                      |                     |                      |                     |                      |                     |
| Current                                  |                      |                     | 0.70                 | [0.46, 1.07]        | 0.71                 | [0.47, 1.08]        |
| Used to                                  |                      |                     | 1.52                 | [0.80, 2.91]        | 1.57                 | [0.82, 3.02]        |
| BMI, kg/m <sup>2</sup>                   |                      |                     | 0.97                 | [0.91, 1.02]        | 0.97                 | [0.92, 1.03]        |
| Social cohesion                          |                      |                     | 0.97                 | [0.75, 1.24]        | 0.98                 | [0.76, 1.27]        |
| Pre-disaster depression                  |                      |                     | 1.00                 | [0.67, 1.48]        | 0.97                 | [0.65, 1.45]        |
| Financial hardship (vs. no)              |                      |                     |                      |                     | 0.69                 | [0.42, 1.12]        |
| Property damage (vs. no)                 |                      |                     |                      |                     |                      |                     |
| Half destroyed or worse                  |                      |                     |                      |                     | 1.12                 | [0.64, 1.97]        |
| Partially destroyed                      |                      |                     |                      |                     | 0.98                 | [0.68, 1.40]        |
| Health care disruption (vs. no)          |                      |                     |                      |                     | 1.33                 | [0.82, 2.16]        |
| Loss of close relatives/friends (vs. no) |                      |                     |                      |                     | 0.74                 | [0.51, 1.07]        |

Definition of abbreviations: PTSD = posttraumatic stress disorder; HR = hazard ratio; CI = confidence interval.

\*\*\* p < 0.001; \*\* p < 0.01; \* p < 0.05.

<sup>a</sup> Model 1 included only post-disaster depression and PTSD.

<sup>b</sup> Model 2 further controlled for pre-disaster socio-demographics, lifestyle covariates, social cohesion, and pre-disaster depression.

<sup>c</sup> Model 3 further controlled for disaster experiences.

**eTable 5. Cox proportional hazards models of the association between incident depression, PTSD, and mortality using, among the subsample free of depression before the disaster, full results**

| Fisk factor                              | Model 1 <sup>a</sup> |                     | Model 2 <sup>b</sup> |                     | Model 3 <sup>c</sup> |                     |
|------------------------------------------|----------------------|---------------------|----------------------|---------------------|----------------------|---------------------|
|                                          | HR                   | [95% CI]            | HR                   | [95% CI]            | HR                   | [95% CI]            |
| <b>Depression</b>                        | <b>2.86</b><br>***   | <b>[1.87, 4.35]</b> | <b>2.09</b> **       | <b>[1.25, 3.49]</b> | <b>2.16</b> **       | <b>[1.29, 3.61]</b> |
| <b>PTSD</b>                              | 0.76                 | [0.47, 1.24]        | 0.88                 | [0.49, 1.59]        | 1.01                 | [0.55, 1.88]        |
| Age, years                               |                      |                     | <b>1.09</b><br>***   | <b>[1.05, 1.13]</b> | <b>1.09</b><br>***   | <b>[1.05, 1.13]</b> |
| Female (vs. male)                        |                      |                     | 0.70                 | [0.33, 1.48]        | 0.69                 | [0.33, 1.46]        |
| Married (vs. no)                         |                      |                     | 0.95                 | [0.54, 1.69]        | 0.96                 | [0.54, 1.70]        |
| Household income                         |                      |                     | 1.01                 | [0.93, 1.09]        | 1.00                 | [0.93, 1.08]        |
| Education (vs. 10-12 years)              |                      |                     |                      |                     |                      |                     |
| <6 years                                 |                      |                     | 1.02                 | [0.13, 7.73]        | 0.97                 | [0.13, 7.39]        |
| 6-9 years                                |                      |                     | 1.25                 | [0.74, 2.09]        | 1.30                 | [0.77, 2.19]        |
| >12 years                                |                      |                     | 0.96                 | [0.54, 1.72]        | 0.97                 | [0.54, 1.73]        |
| Smoking status (vs. never)               |                      |                     |                      |                     |                      |                     |
| Current                                  |                      |                     | 1.23                 | [0.54, 2.79]        | 1.25                 | [0.55, 2.84]        |
| Used to                                  |                      |                     | 1.47                 | [0.78, 2.79]        | 1.48                 | [0.78, 2.81]        |
| Drinking status (vs. never)              |                      |                     |                      |                     |                      |                     |
| Current                                  |                      |                     | 0.88                 | [0.51, 1.51]        | 0.86                 | [0.50, 1.49]        |
| Used to                                  |                      |                     | 1.38                 | [0.46, 4.08]        | 1.40                 | [0.47, 4.20]        |
| BMI, kg/m <sup>2</sup>                   |                      |                     | 1.00                 | [0.93, 1.08]        | 1.00                 | [0.93, 1.08]        |
| Social cohesion                          |                      |                     | 1.08                 | [0.74, 1.57]        | 1.10                 | [0.76, 1.61]        |
| Financial hardship (vs. no)              |                      |                     |                      |                     | 0.59                 | [0.28, 1.24]        |
| Property damage (vs. no)                 |                      |                     |                      |                     |                      |                     |
| Half destroyed or worse                  |                      |                     |                      |                     | 1.17                 | [0.55, 2.50]        |
| Partially destroyed                      |                      |                     |                      |                     | 0.90                 | [0.56, 1.45]        |
| Health care disruption (vs. no)          |                      |                     |                      |                     | 0.90                 | [0.41, 2.00]        |
| Loss of close relatives/friends (vs. no) |                      |                     |                      |                     | 0.92                 | [0.57, 1.48]        |

Definition of abbreviations: PTSD = posttraumatic stress disorder; HR = hazard ratio; CI = confidence interval.

\*\*\* p < 0.001; \*\* p < 0.01; \* p < 0.05.

<sup>a</sup> Model 1 included only post-disaster depression and PTSD.

<sup>b</sup> Model 2 further controlled for pre-disaster socio-demographics, lifestyle covariates, and social cohesion.

<sup>c</sup> Model 3 further controlled for disaster experiences.
